# Supplementary material for: Structural transitions during the water sorption process in two layered metal hydrogen-bonded organic frameworks and the effect of the H-bond strength between the layers
Source: Royal Society of Chemistry journal article supplement (doi:10.1039/d2ce00138a), 2022-01-01
Supplement: d2ce00138a1.pdf [file d2ce00138a1.pdf]

## Electronic Supplementary Information

### Structural Transitions during the Water Sorption Process in two Layered Metal Hydrogen-Bonded Organic Frameworks and the Effect of the H-Bonds Strength between the Layers

Patrice Kenfack Tsobnang<sup>\*a</sup>, Yannick Thiery Sakam Nchedoung<sup>a</sup>, Dominik Fröhlich<sup>b</sup>, Florence Porcher<sup>c</sup>, Lina Rustam<sup>b</sup>, Emrah Hastürk<sup>d</sup>, Christoph Janiak<sup>\*d</sup>

<sup>a</sup> *University of Dschang, Department of Chemistry, PO Box 67, Dschang, Cameroon,*

<sup>b</sup> *Fraunhofer-Institut for Solar Energy Systems ISE, Division Thermal Systems and Buildings, Heidenhofstraße 2, 79110 Freiburg, Germany,*

<sup>c</sup> *Laboratoire Léon Brillouin (LLB), UMR 12 CEA/CNRS, Bât. 563 CEA Saclay, 91191 Gif-sur-Yvette cedex, France*

<sup>d</sup> *Institut für Anorganische Chemie und Strukturchemie, Heinrich-Heine-Universität Düsseldorf, Universitätsstraße 1, 40225 Düsseldorf, Germany,*

\* Corresponding authors. E-mail addresses: [patrice.kenfack@univ-dschang.org](mailto:patrice.kenfack@univ-dschang.org), [pakenfack@gmail.com](mailto:pakenfack@gmail.com) (P. K. Tsobnang); [janiak@uni-duesseldorf.de](mailto:janiak@uni-duesseldorf.de) (C. Janiak)

## Section 1. Packing diagrams and characteristics of the Hydrogen bonds of I' and II'

**Table S1.** Hydrogen bonds length (in Å) and angles (°) for I'<sup>1</sup>

| Packing direction | D-H...A                          | d(D-H) Å | d(H...A) (Å) | d(D...A) (Å) | (DHA) (°) |
|-------------------|----------------------------------|----------|--------------|--------------|-----------|
| <i>a</i> axis     | N(6)-H(6B)...O(1) <sup>iv</sup>  | 0.79(9)  | 2.13(9)      | 2.910(8)     | 170(9)    |
|                   | N(4)-H(4B)...O(11) <sup>ii</sup> | 0.90     | 2.02         | 2.837(7)     | 150.7     |
|                   | N(3)-H(3A)...O(11) <sup>ii</sup> | 0.88(8)  | 2.23(8)      | 2.901(8)     | 133(7)    |
| <i>c</i> axis     | N(4)-H(4A)...O(10) <sup>i</sup>  | 0.90     | 1.85         | 2.718(7)     | 160.1     |
|                   | N(6)-H(6A)...O(10) <sup>i</sup>  | 0.87(8)  | 2.32(8)      | 3.130(9)     | 155(7)    |
|                   | N(6)-H(6A)...O(9) <sup>i</sup>   | 0.87(8)  | 2.57(8)      | 3.246(9)     | 136(7)    |
| <i>b</i> axis     | C(9)-H(9)...O(3) <sup>v</sup>    | 0.93     | 2.48         | 3.150(7)     | 128.5     |
|                   | N(3)-H(3B)...O(8) <sup>iii</sup> | 0.86(8)  | 2.05(9)      | 2.777(8)     | 141(8)    |

Symmetry codes : i)  $x, y, z-1$  ii)  $x-1/2, -y+1/2, z-1/2$  iii)  $-x, -y, -z+1$  iv)  $x+1/2, -y+1/2, z-1/2$  v)  $-x+1/2, y+1/2, -z+3/2$

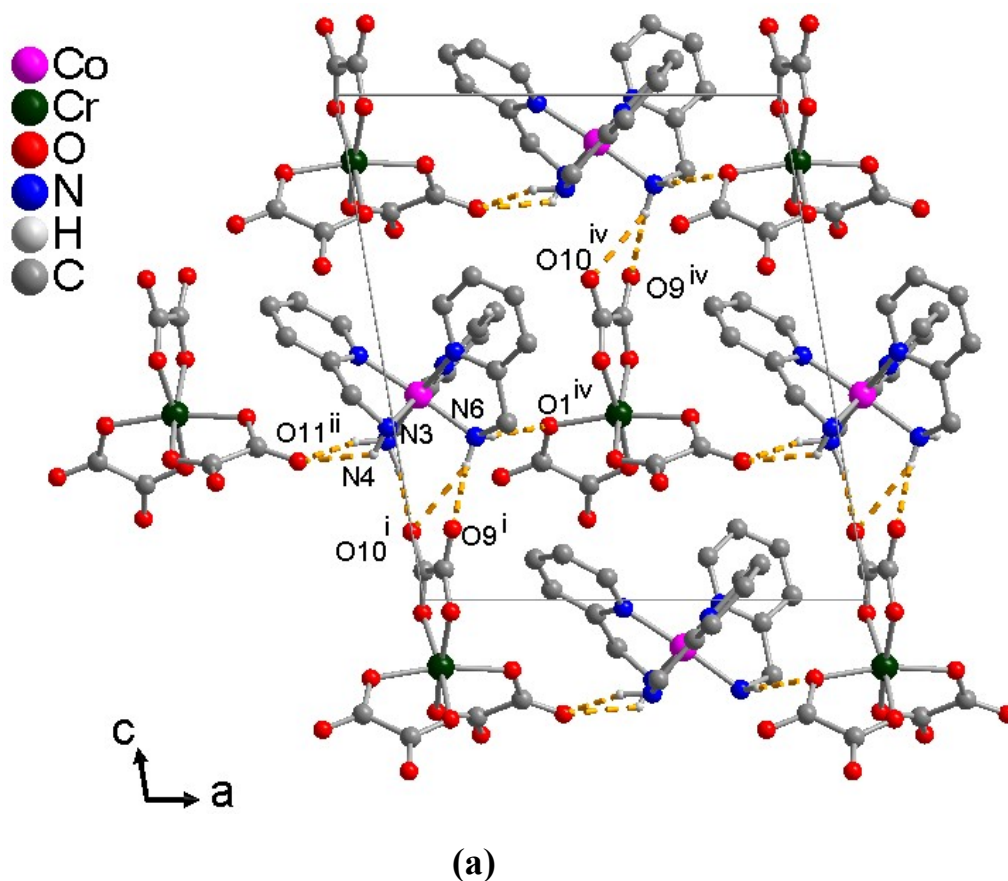

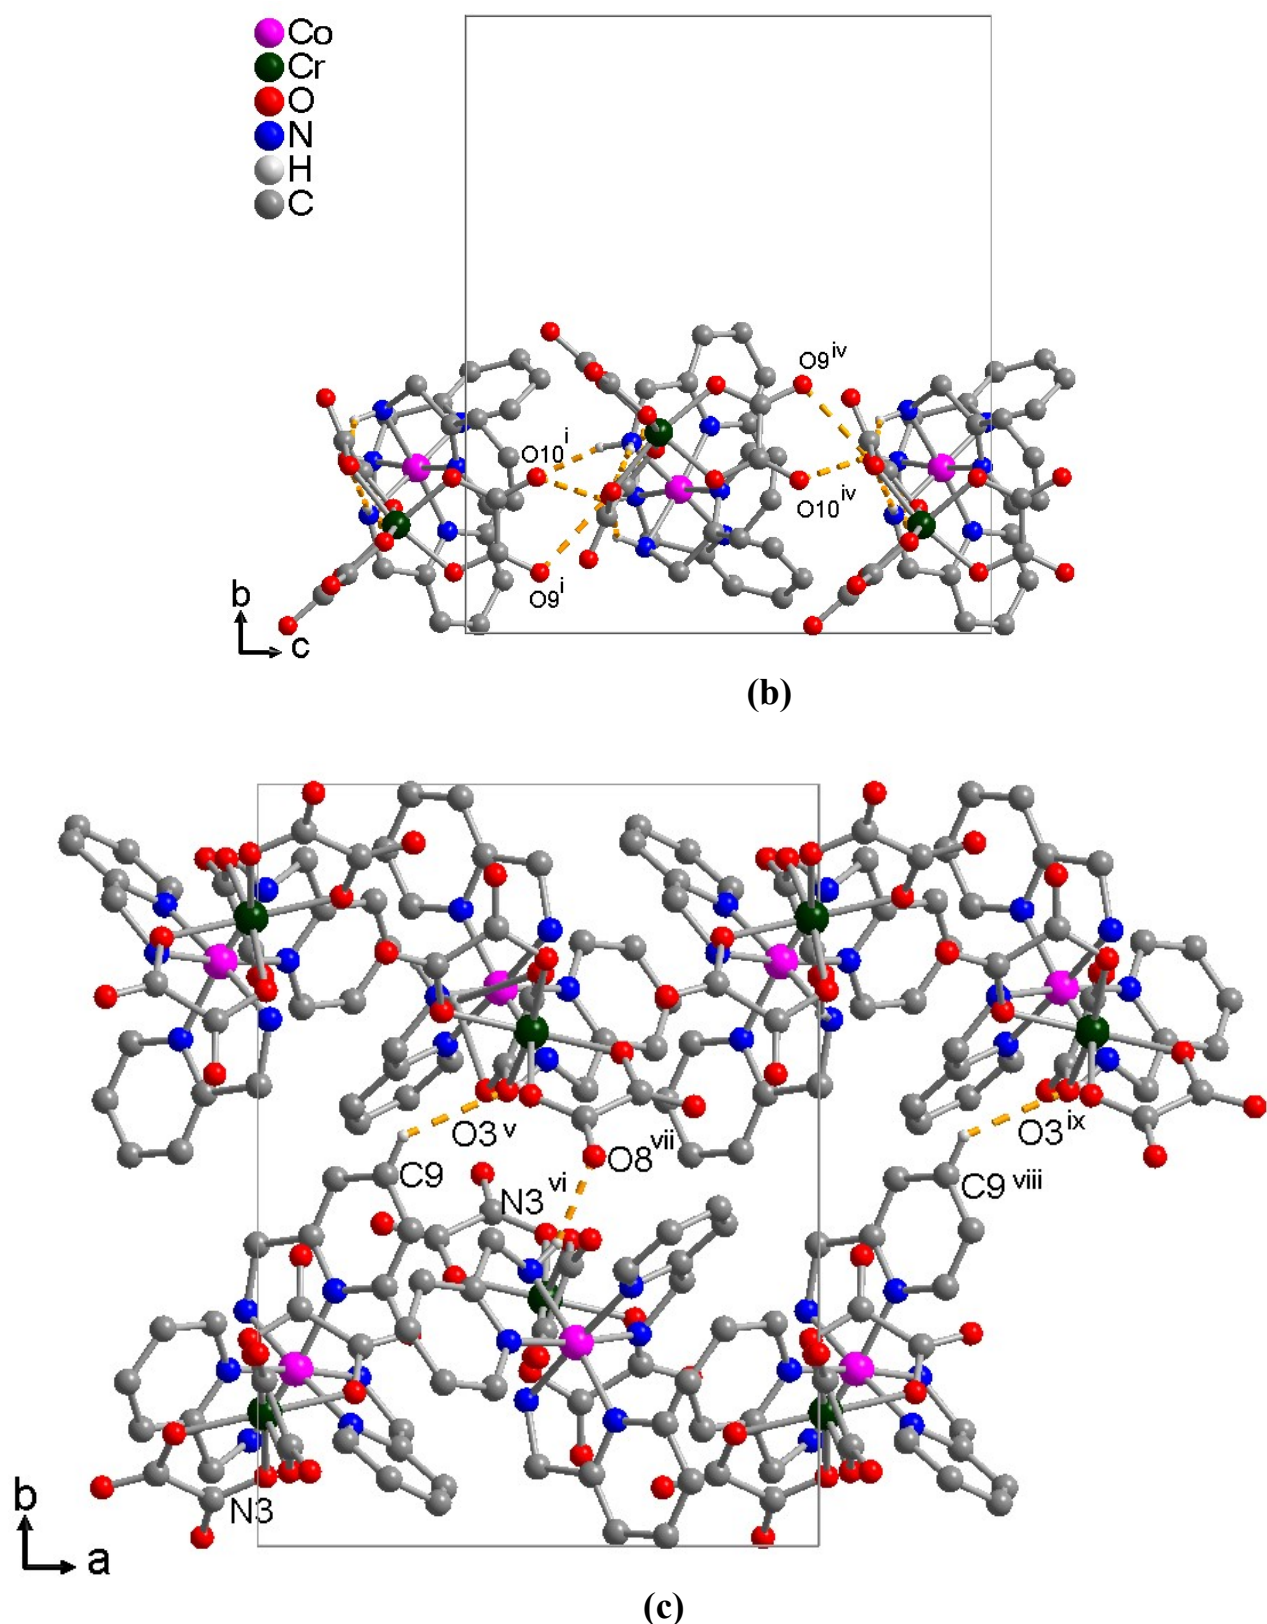

**Figure S1.** Diagrams showing: **(a)** the packing of the ionic units of **I'** to build a layer in the *ac* plane, **(b)** a layer of **I'** in the *bc* plane **(c)**: the stacking of two consecutive layers of **I'** along the *b* axis direction.

The Hydrogen bonds in this packing are drawn with light orange color and for clarity, only the hydrogen atoms involved in these hydrogen bonds are shown.

See Table S1 for symmetry codes. Additional codes: *vi*:  $x + \frac{1}{2}, -y + \frac{1}{2}, z + \frac{1}{2}$ ; *vii*:  $-x + \frac{1}{2}, y + \frac{1}{2}, -z + \frac{3}{2}$ ; *viii*:  $x + 1, y, z$ ; *ix*:  $-x + \frac{3}{2}, y + \frac{1}{2}, -z + \frac{3}{2}$ .

**Table S2.** Hydrogen bonds length (in Å) and angles (°) for  $\Pi'$  <sup>2</sup>

| Packing direction | D-H...A                     | d(D-H) Å | d(H...A) (Å) | d(D...A) (Å) | (DHA) (°) |
|-------------------|-----------------------------|----------|--------------|--------------|-----------|
| <i>c axis</i>     | N6—H6B···O5                 | 0.86 (6) | 2.16 (6)     | 2.915 (6)    | 145 (5)   |
|                   | N8—H8B···O3                 | 0.82 (6) | 2.20 (6)     | 2.966 (5)    | 155 (5)   |
|                   | N3—H3B···O12                | 0.90 (5) | 2.25 (5)     | 3.023 (5)    | 143 (4)   |
|                   | N1—H1A···O6                 | 0.89 (6) | 2.06 (6)     | 2.916 (6)    | 161 (5)   |
| <i>a axis</i>     | N6—H6A···O9 <sup>ii</sup>   | 0.94 (6) | 2.44 (6)     | 3.205 (6)    | 139 (5)   |
|                   | C13—H13···O9 <sup>ii</sup>  | 0.93     | 2.50         | 3.326 (6)    | 148       |
|                   | C14—H14···O8 <sup>ii</sup>  | 0.93     | 2.60         | 3.517 (6)    | 170       |
|                   | C26—H26···O4 <sup>iv</sup>  | 0.93     | 2.52         | 3.277 (7)    | 139       |
| <i>b axis</i>     | O1W—H2W···O6 <sup>v</sup>   | 0.87     | 2.18         | 3.017 (6)    | 161.3     |
|                   | O1W—H1W···O2 <sup>iv</sup>  | 0.98     | 2.06         | 3.011 (7)    | 164.9     |
|                   | N1—H1B···O1W                | 1.02 (6) | 2.04 (6)     | 3.038 (7)    | 165 (5)   |
|                   | N8—H8A···O1 <sup>i</sup>    | 0.82 (6) | 2.25 (6)     | 3.012 (6)    | 157 (5)   |
|                   | N3—H3A···O10 <sup>i</sup>   | 0.88 (5) | 2.19 (5)     | 2.973 (5)    | 147 (4)   |
|                   | C22—H22···O1 <sup>iii</sup> | 0.93     | 2.32         | 3.033 (7)    | 134       |

Symmetry codes : (i)  $-x + 1, -y, -z + 1$ ; (ii)  $x - 1/2, -y + 1/2, z + 1/2$ ; (iii)  $-x + 1/2, y + 1/2, -z + 3/2$ ; (iv)  $x + 1/2, -y + 1/2, z - 1/2$ ; (v)  $-x + 1, -y + 1, -z$ ; (vi)  $x, y, z + 1$ .

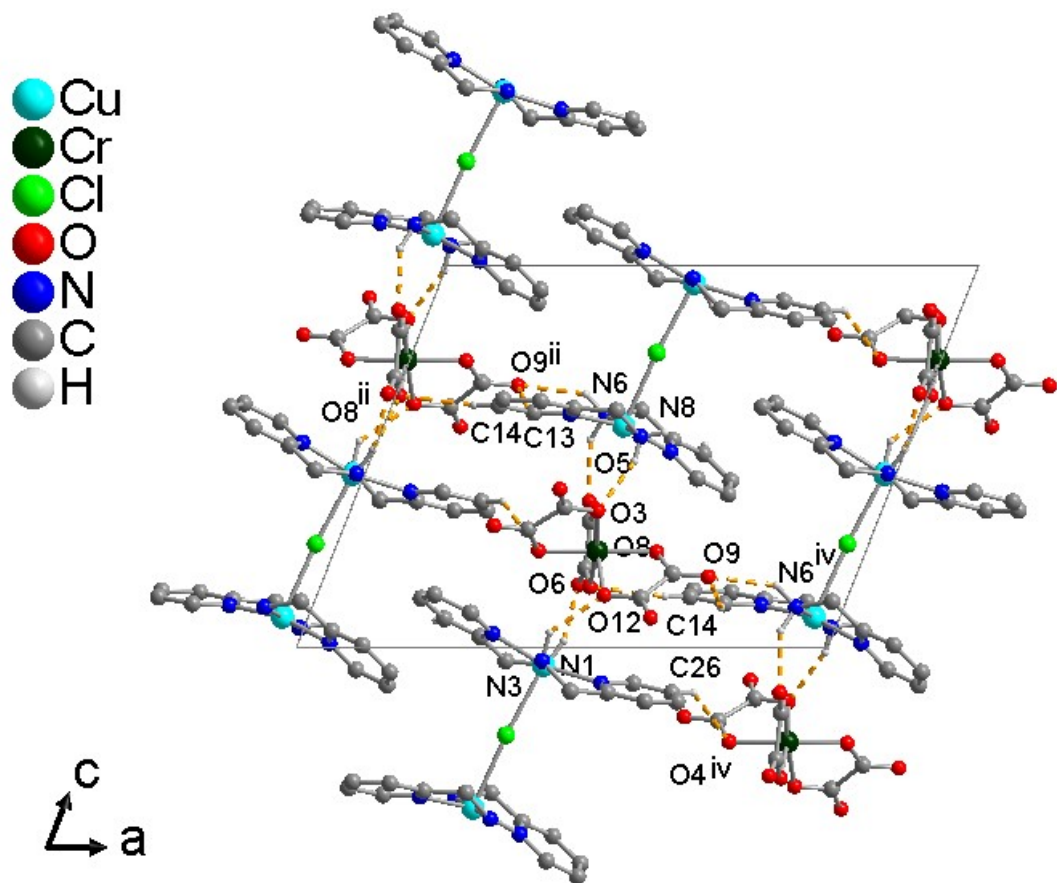

(a)

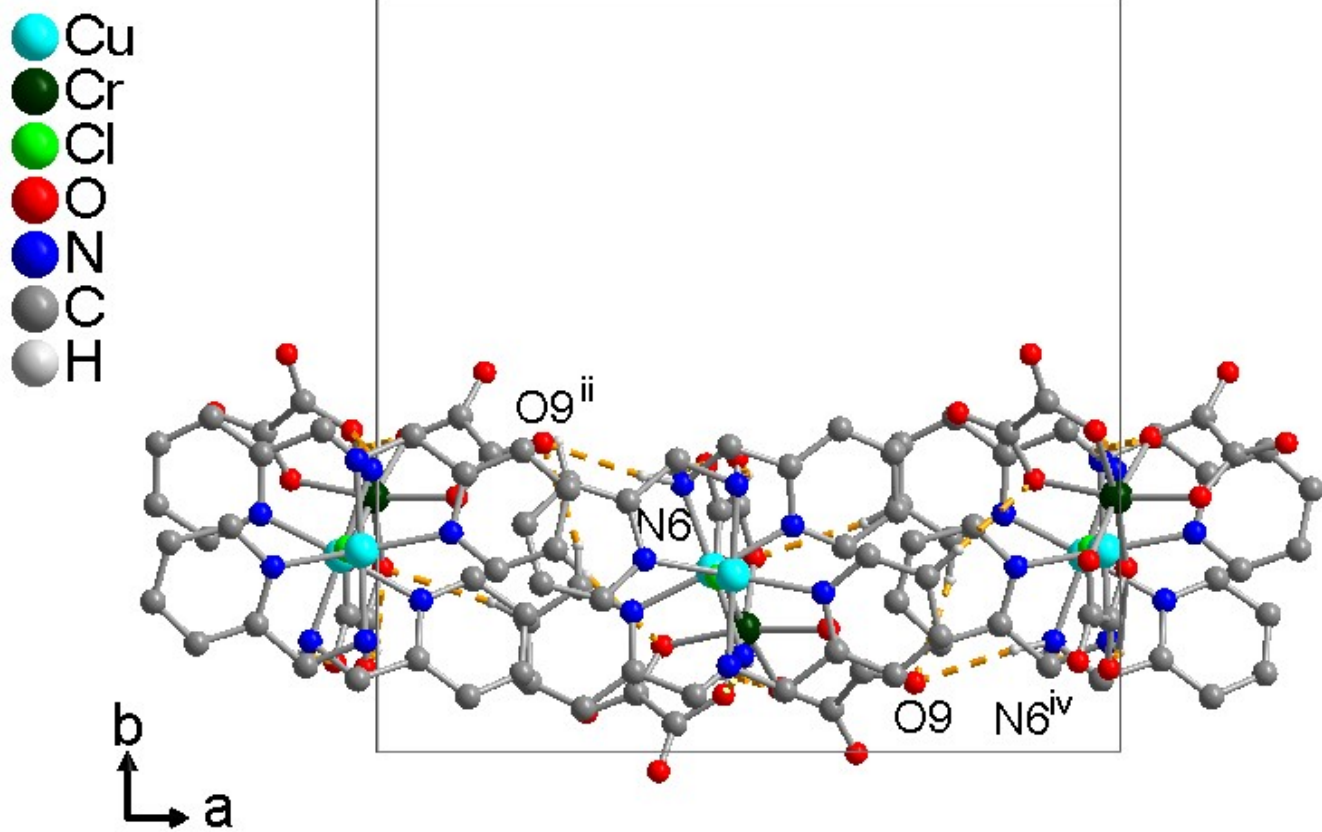

(b)



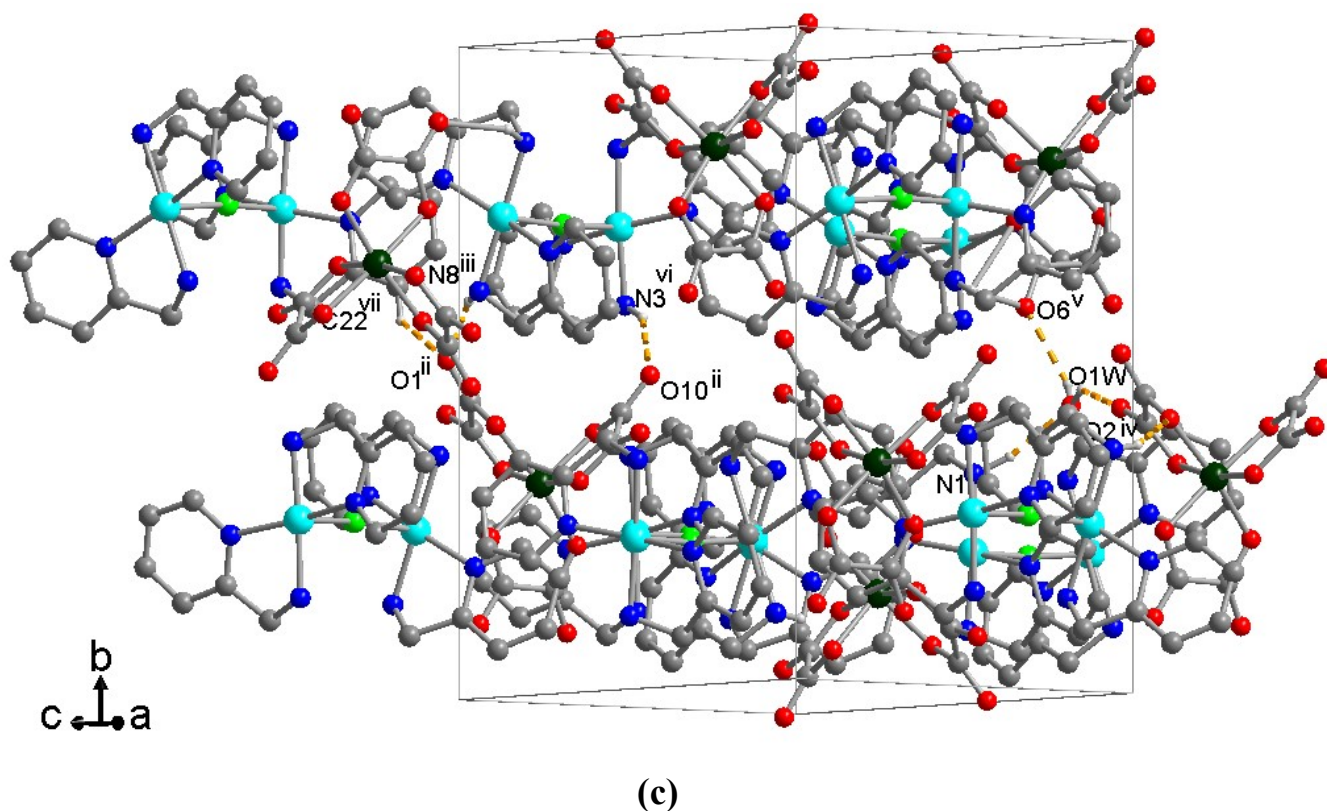

**Figure S2.** Diagrams showing: **(a)** the packing of units of **II'** to build a layer in the *ac* plane, **(b)** a layer of **II'** along the *b* axis direction and **(c)**: the stacking along the *b* axis direction of two consecutive layers of **II'**.

The Hydrogen bonds in this packing are drawn with light orange color and for clarity, only the hydrogen atoms involved in these hydrogen bonds are shown.

See Table S2 for symmetry codes. Additional codes: *vi*:  $-x + \frac{1}{2}, y + \frac{1}{2}, -z + \frac{1}{2}$ ; *vii*:  $-x, -y + 1, -z + 1$ .

## Section 2. Synthesis of $[\text{Co}(\text{amp})_3][\text{Cr}(\text{ox})_3] \cdot 6\text{H}_2\text{O}$ (I) and $[\text{Cu}_2(\text{amp})_4\text{Cl}][\text{Cr}(\text{ox})_3] \cdot 6\text{H}_2\text{O}$ (II)

Apart from the compound  $\text{K}_3\text{Cr}(\text{ox})_3 \cdot 3\text{H}_2\text{O}$  which has been previously synthesized, all the other reagents used in this work are all from commercial sources and were used without any treatment. The list of these chemical are: potassium oxalate monohydrate ( $\text{K}_2\text{C}_2\text{O}_4 \cdot \text{H}_2\text{O}$ , 99%, Sigma- Aldrich), oxalic acid dihydrate ( $\text{H}_2\text{C}_2\text{O}_4 \cdot 2\text{H}_2\text{O}$ , 99.9%, Fisher Scientific International Company), potassium dichromate ( $\text{K}_2\text{Cr}_2\text{O}_7$ , 99%, ABSEQ company LTD), cobalt chloride hexahydrate ( $\text{CoCl}_2 \cdot 6\text{H}_2\text{O}$ , 98.9%, Sigma-Aldrich), 2-picolyamine ( $\text{C}_6\text{H}_8\text{N}_2$ , 98.0%, Sigma-Aldrich), and Copper chloride dihydrate ( $\text{CuCl}_2 \cdot 2\text{H}_2\text{O}$ , 99%, Sigma-Aldrich). The synthesis of  $\text{K}_3\text{Cr}(\text{ox})_3 \cdot 3\text{H}_2\text{O}$  has been done by dissolving 10.55 g (62 mmol) of  $\text{K}_2\text{C}_2\text{O}_4 \cdot \text{H}_2\text{O}$  crystals in preheated distilled water and the solution obtained is left under magnetic stirring for three minutes. Then, 27.5 g (22 mmol) of  $\text{H}_2\text{C}_2\text{O}_4 \cdot 2\text{H}_2\text{O}$  were added in small portions. After total dissolution, 9.5 g (32 mmol) of  $\text{K}_2\text{Cr}_2\text{O}_7$  added in small portions. The reaction mixture was left under strong thermal stirring for 45 min at a temperature of 80 ° C. The solution obtained was filtered and left for slow evaporation for ten days. 28.36 g of large elongated crystals, of purple-blue color of  $\text{K}_3\text{Cr}(\text{ox})_3 \cdot 3\text{H}_2\text{O}$  (yield of 91%) in agreement with the literature were obtained.

For the synthesis of  $[\text{Co}(\text{amp})_3][\text{Cr}(\text{ox})_3]$  (I), 1.57 g (3.22 mmol) of  $\text{K}_3\text{Cr}(\text{ox})_3 \cdot 3\text{H}_2\text{O}$  previously synthesized were dissolved in 10ml of water at 60 °C and 15 min later, the mixture of 0.77 g (3.2 mmol) of  $\text{CoCl}_2 \cdot 6\text{H}_2\text{O}$  and 1 mL (9.7 mmol) of 2-picolyamine was added. The solution was stirred for 20 minutes at 60 °C then filtered and concentrated by slow evaporation of the solvent under ambient air. After 6 days, brown crystals of (I) were obtained from this solution. These crystals were filtered, washed with water and acetone. For  $[\text{Cu}_2(\text{amp})_4\text{Cl}][\text{Cr}(\text{ox})_3] \cdot 1\text{H}_2\text{O}$  (II), 0.28 g (1.64 mmol) of  $\text{CuCl}_2 \cdot 2\text{H}_2\text{O}$  were dissolved in 10 mL of water and 0.5 mL (4.94 mmol) of 2-picolyamine was added. The solution was stirred for 15 minutes at 60 ° C and before adding a solution of  $\text{K}_3\text{Cr}(\text{C}_2\text{O}_4)_3 \cdot 3\text{H}_2\text{O}$  obtained by dissolving 0.76 g of the compound (1.64 mmol) in 10 mL of water at 60 °C. The mixture was stirred for 30 minutes at this temperature, then filtered and concentrated by slow evaporation of the solvent in ambient air. A filtrate formed one week later blue crystals of prismatic shape with a yield of 71% in agreement with the literature.

### Section 3: Crystal data of the materials and confirmation of the synthesis of I and II.

**Table S3.** Crystal data for I', I, II' and II <sup>1,2</sup>

|                                    | I'                                                | I                                                                   | II'                                                                                 | II                                                                                  |
|------------------------------------|---------------------------------------------------|---------------------------------------------------------------------|-------------------------------------------------------------------------------------|-------------------------------------------------------------------------------------|
| <b>Chemical formula</b>            | [Co(amp) <sub>3</sub> ]<br>[Cr(ox) <sub>3</sub> ] | [Co(amp) <sub>3</sub> ]<br>[Cr(ox) <sub>3</sub> ]·6H <sub>2</sub> O | [Cu <sub>2</sub> (amp) <sub>4</sub> Cl]<br>[Cr(ox) <sub>3</sub> ]·1H <sub>2</sub> O | [Cu <sub>2</sub> (amp) <sub>4</sub> Cl]<br>[Cr(ox) <sub>3</sub> ]·6H <sub>2</sub> O |
| <b>Crystal system, space group</b> | Monoclinic,<br>P2 <sub>1</sub> /n                 | Monoclinic,<br>P2 <sub>1</sub> /n                                   | Monoclinic,<br>P2 <sub>1</sub> /n                                                   | Monoclinic,<br>C2/c                                                                 |
| <i>a</i> (Å)                       | 12.002(3)                                         | 13.2467(7)                                                          | 17.568(5)                                                                           | 17.5980(5)                                                                          |
| <i>b</i> (Å)                       | 16.051(4)                                         | 18.2864(10)                                                         | 16.601(5)                                                                           | 18.3030(5)                                                                          |
| <i>c</i> (Å)                       | 13.853(4)                                         | 14.1403(6)                                                          | 13.578(5)                                                                           | 13.8200(4)                                                                          |
| $\beta$ (°)                        | 99.754(6)                                         | 100.017(2)                                                          | 68.486(5)                                                                           | 113.671(1)                                                                          |
| <b>Volume (Å<sup>3</sup>)</b>      | 2630.0(13)                                        | 4108.5(3)                                                           | 3684(2)                                                                             | 4076.9(2)                                                                           |

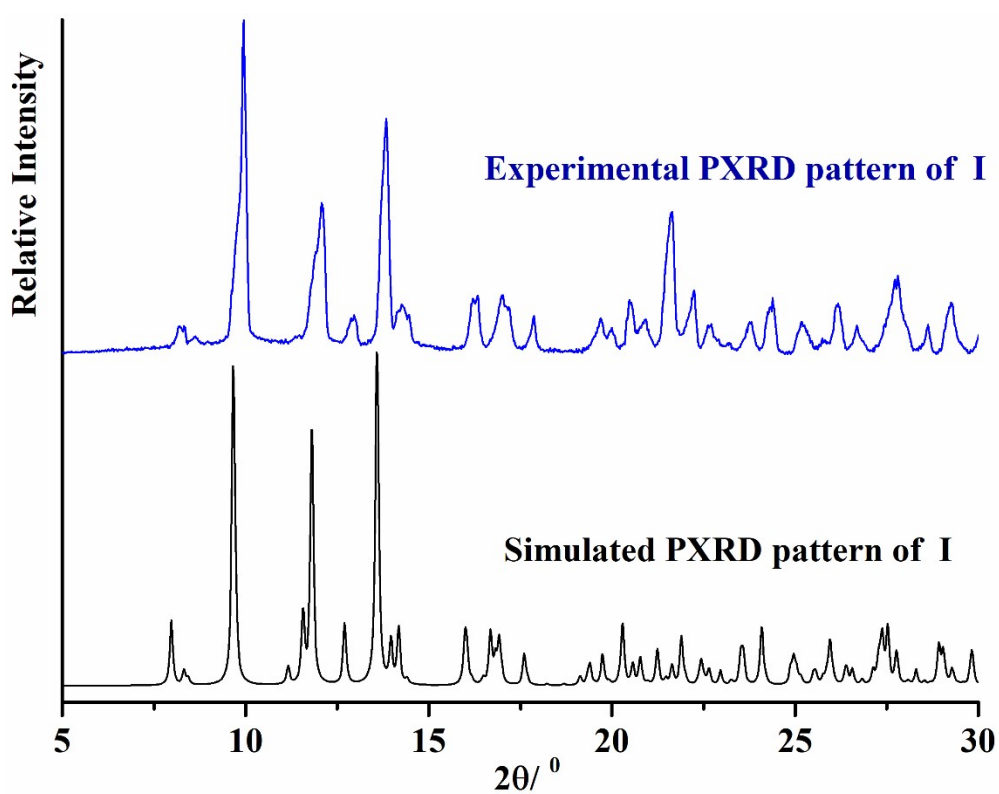

(a)



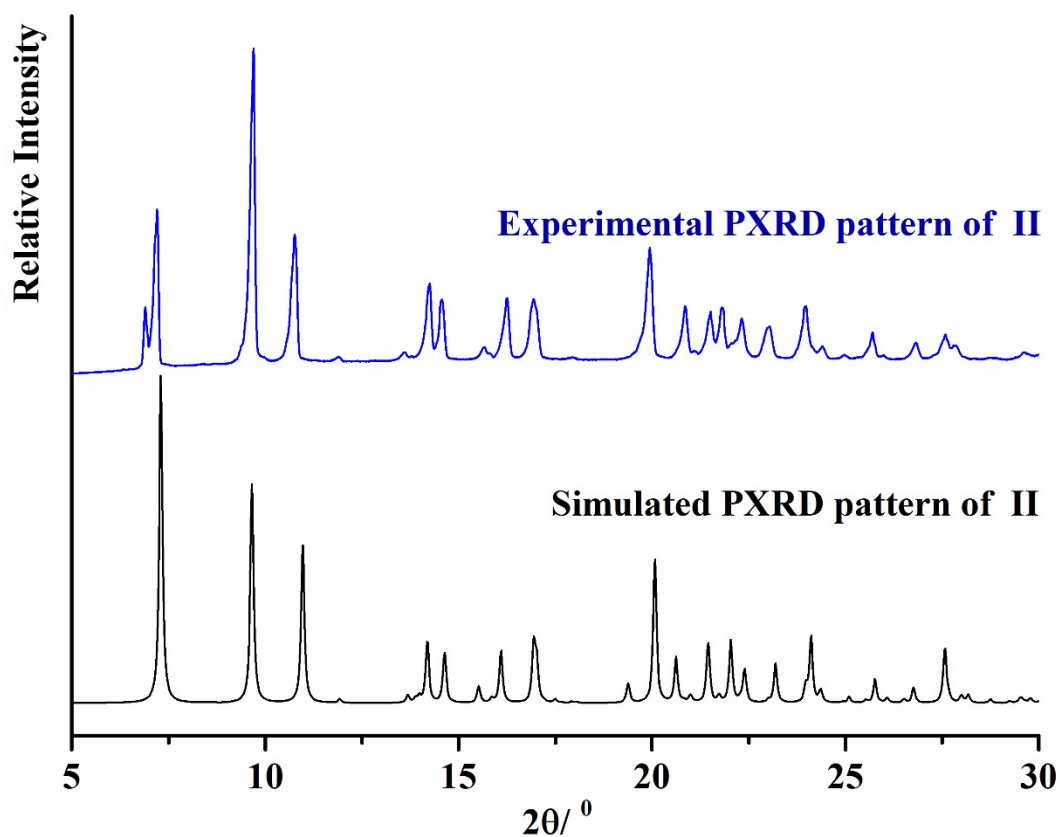

(b)

**Figure S3.** Diagram showing the perfect matching of the experimental and the simulated Powder X-ray diffraction patterns of: a) **I** and b) **II**.

The software Mercury was used for simulations from the X-ray structure data sets.<sup>3</sup> *The less intense additional peak attached to the first peak in the experimental PXRD pattern of **II** is related to its partial dehydrated phase (**II'**). Such a mismatch between simulated and experimental diffractograms was already experienced earlier by us for flexible solvent-filled frameworks<sup>2, 4, 5</sup>.*

## Section 4. Elemental analysis of both compounds

**Table S4.** Results from elemental analysis of **I** and **II**. A PerkinElmer 2400 series 2 elemental analyzer was used.

|           | %C    |       | %N    |       | %H   |      |
|-----------|-------|-------|-------|-------|------|------|
|           | Exp   | Calc  | Exp   | Calc  | Exp  | Calc |
| <b>I</b>  | 35.32 | 35.66 | 10.29 | 10.41 | 3.96 | 4.49 |
| <b>II</b> | 37.06 | 35.35 | 11.47 | 10.99 | 3.94 | 4.35 |

## Section 5. Lattice parameters of the two materials at the studied humidity levels

**Table S5.** Values of the lattice parameters of **I**/**I** during the adsorption of water molecules at different humidity levels

| Humidity levels (%) | Lattice parameters |        |        |         | Volumes (Å <sup>3</sup> ) |
|---------------------|--------------------|--------|--------|---------|---------------------------|
|                     | a (Å)              | b (Å)  | c (Å)  | β (°)   |                           |
| 0.0                 | 12.054             | 16.092 | 13.884 | 99.801  | 2651.649                  |
| 7.5                 | 12.069             | 16.151 | 13.893 | 99.896  | 2665.619                  |
| 12.9                | 12.067             | 16.176 | 13.889 | 99.883  | 2668.643                  |
| 17.7                | 12.067             | 16.176 | 13.891 | 99.881  | 2669.044                  |
| 22.4                | 12.061             | 16.175 | 13.887 | 99.876  | 2666.826                  |
| 27.7                | 12.067             | 16.195 | 13.888 | 99.911  | 2671.351                  |
| 32.2                | 13.233             | 18.261 | 14.139 | 100.501 | 3356.475                  |
| 37.0                | 13.233             | 18.261 | 14.139 | 100.501 | 3356.475                  |
| 45.2                | 13.233             | 18.261 | 14.131 | 100.501 | 3354.576                  |
| 49.5                | 13.243             | 18.267 | 14.141 | 100.588 | 3359.614                  |
| 51.7                | 13.257             | 18.279 | 14.110 | 100.660 | 3357.159                  |
| 56.7                | 13.284             | 18.307 | 14.123 | 100.543 | 3373.604                  |
| 64.4                | 13.291             | 18.294 | 14.137 | 100.727 | 3374.234                  |
| 66.4                | 13.276             | 18.297 | 14.129 | 100.637 | 3370.098                  |
| 79.1                | 13.273             | 18.318 | 14.127 | 100.542 | 3373.728                  |
| 81.2                | 13.269             | 18.321 | 14.129 | 100.477 | 3374.641                  |
| 85.2                | 13.270             | 18.329 | 14.121 | 100.367 | 3375.589                  |
| 88.1                | 13.263             | 18.329 | 14.124 | 100.276 | 3375.530                  |

**Table S6. Values of the lattice parameters of I'/I during the desorption of water molecules at different humidity levels**

| Humidity levels (%) | Lattice parameters |        |        |         | Volumes (Å <sup>3</sup> ) |
|---------------------|--------------------|--------|--------|---------|---------------------------|
|                     | a (Å)              | b (Å)  | c (Å)  | β (°)   |                           |
| 88.1                | 13.263             | 18.329 | 14.124 | 100.276 | 3375.530                  |
| 86.9                | 13.245             | 18.340 | 14.129 | 100.222 | 3374.783                  |
| 83.5                | 13.243             | 18.333 | 14.127 | 100.201 | 3372.712                  |
| 79.9                | 13.240             | 18.325 | 14.126 | 100.186 | 3370.401                  |
| 76.9                | 13.233             | 18.325 | 14.128 | 100.150 | 3369.487                  |
| 61.5                | 13.256             | 18.313 | 14.138 | 100.170 | 3375.304                  |
| 59.9                | 13.190             | 18.243 | 14.095 | 99.908  | 3338.267                  |
| 54.4                | 13.185             | 18.236 | 14.956 | 99.908  | 3539.486                  |
| 47.3                | 13.250             | 18.294 | 14.139 | 100.124 | 3371.013                  |
| 44.4                | 13.249             | 18.285 | 14.137 | 100.111 | 3368.764                  |
| 37.1                | 13.248             | 18.281 | 14.135 | 100.110 | 3367.307                  |
| 32.1                | 13.246             | 18.275 | 14.134 | 100.105 | 3365.509                  |
| 28.4                | 13.243             | 18.269 | 14.131 | 100.097 | 3363.015                  |
| 22.4                | 13.242             | 18.262 | 14.129 | 100.096 | 3361.007                  |
| 17.6                | 13.241             | 18.256 | 14.125 | 100.088 | 3358.784                  |
| 12.7                | 13.241             | 18.256 | 14.125 | 100.088 | 3358.784                  |
| 7.3                 | 13.241             | 18.256 | 14.125 | 100.088 | 3358.784                  |
| 0.0                 | 12.106             | 16.081 | 13.908 | 99.743  | 2666.287                  |

**Table S7. Values of the lattice parameters of II 'II during the adsorption of water molecules at different humidity levels**

| Humidity levels (%) | Lattice parameters |         |         | $\beta$ (°) | Volumes (Å <sup>3</sup> ) |
|---------------------|--------------------|---------|---------|-------------|---------------------------|
|                     | a (Å)              | b (Å)   | c (Å)   |             |                           |
| 0.0                 | 17.5728            | 16.5700 | 13.5958 | 111.4606    | 3684.3801                 |
| 7.5                 | 17.5990            | 16.5433 | 13.6021 | 111.344     | 3688.5447                 |
| 17.7                | 17.499             | 17.877  | 13.751  | 112.592     | 3962.695                  |
| 22.4                | 17.516             | 17.956  | 13.763  | 112.7067    | 3984.571                  |
| 27.1                | 17.528             | 17.984  | 13.773  | 112.772     | 3994.463                  |
| 32.2                | 17.530             | 18.033  | 13.777  | 112.866     | 4003.848                  |
| 37.0                | 17.571             | 18.168  | 13.807  | 113.219     | 4041.460                  |
| 45.2                | 17.588             | 18.219  | 13.818  | 113.341     | 4056.363                  |
| 49.4                | 17.611             | 18.285  | 13.835  | 113.552     | 4074.359                  |
| 51.7                | 17.607             | 18.296  | 13.834  | 113.600     | 4074.287                  |
| 56.7                | 17.622             | 18.329  | 13.845  | 113.702     | 4085.205                  |
| 64.4                | 17.648             | 18.373  | 13.858  | 113.870     | 4099.328                  |
| 66.4                | 17.637             | 18.374  | 13.855  | 113.860     | 4096.421                  |
| 71.1                | 17.642             | 18.391  | 13.859  | 113.897     | 4101.341                  |
| 79.5                | 17.648             | 18.408  | 13.862  | 113.956     | 4105.386                  |
| 81.2                | 17.652             | 18.414  | 13.864  | 113.972     | 4107.978                  |
| 85.1                | 17.656             | 18.421  | 13.866  | 114.001     | 4110.377                  |
| 88.1                | 17.657             | 18.428  | 13.867  | 114.015     | 4111.912                  |

**Table S8. Values of the lattice parameters of II ' during the desorption of water molecules at different humidity levels**

| Humidity levels (%) | Lattice parameters |        |        |         | Volumes (Å <sup>3</sup> ) |
|---------------------|--------------------|--------|--------|---------|---------------------------|
|                     | a (Å)              | b (Å)  | c (Å)  | β (°)   |                           |
| 88.1                | 17.657             | 18.428 | 13.867 | 114.015 | 4111.912                  |
| 86.9                | 17.658             | 18.426 | 13.868 | 114.013 | 4111.883                  |
| 83.5                | 17.655             | 18.417 | 13.865 | 113.983 | 4109.089                  |
| 79.9                | 17.645             | 18.404 | 13.860 | 113.946 | 4103.613                  |
| 76.9                | 17.645             | 18.404 | 13.860 | 113.945 | 4103.607                  |
| 67.9                | 17.639             | 18.379 | 13.856 | 113.882 | 4097.494                  |
| 61.5                | 17.630             | 18.349 | 13.851 | 113.791 | 4090.0732                 |
| 59.9                | 17.630             | 18.349 | 13.851 | 113.791 | 4090.077                  |
| 54.4                | 17.617             | 18.315 | 13.842 | 113.676 | 4080.649                  |
| 47.3                | 17.603             | 18.272 | 13.830 | 113.539 | 4068.915                  |
| 44.4                | 17.589             | 18.216 | 13.823 | 113.406 | 4051.875                  |
| 37.1                | 17.569             | 18.165 | 13.807 | 113.245 | 4039.469                  |
| 32.1                | 17.557             | 18.113 | 13.797 | 113.056 | 4028.018                  |
| 28.4                | 17.535             | 18.033 | 13.781 | 112.874 | 4006.061                  |
| 22.4                | 17.517             | 17.959 | 13.766 | 112.732 | 3985.181                  |
| 17.6                | 17.503             | 17.880 | 13.755 | 112.607 | 3965.0278                 |
| 12.7                | 17.493             | 17.822 | 13.747 | 112.580 | 3948.935                  |
| 0.0                 | 17.571             | 16.570 | 13.598 | 111,464 | 3689.131                  |

## Section 6. Powder diffraction patterns of I'/I during the discontinuous phase transition

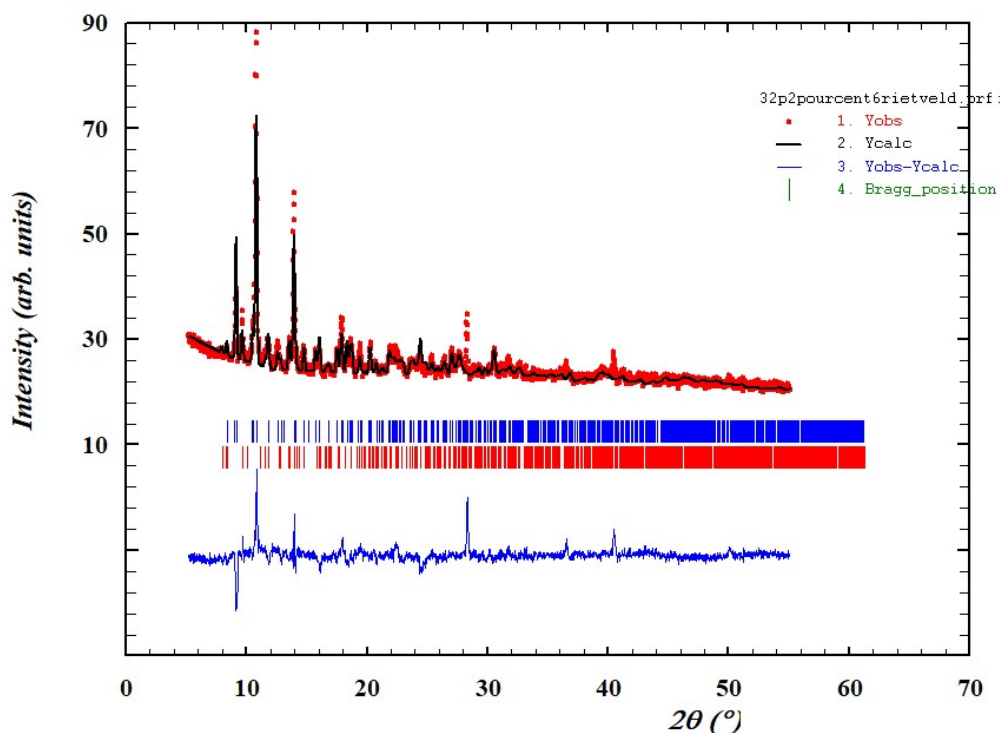

BRAGG R-Factors and weight fractions for Pattern # 1

-----

=> Phase: 1 I'

=> Bragg R-factor: 28.7 Vol: 2723.615(3.551) Fact (%): 82.07(5.83)

=> Rf-factor= 19.5 ATZ: 2797.669 Brindley: 1.0000

=> Phase: 2 I

=> Bragg R-factor: 33.7 Vol: 3379.703(15.118) Fact (%): 17.93(3.84)

=> Rf-factor= 21.4 ATZ: 3230.040 Brindley: 1.0000

-----

**Figure S4.** Powder diffraction patterns of I'/I at 32.2 % r.H. and values of agreement parameters obtained with Rietveld refinement.



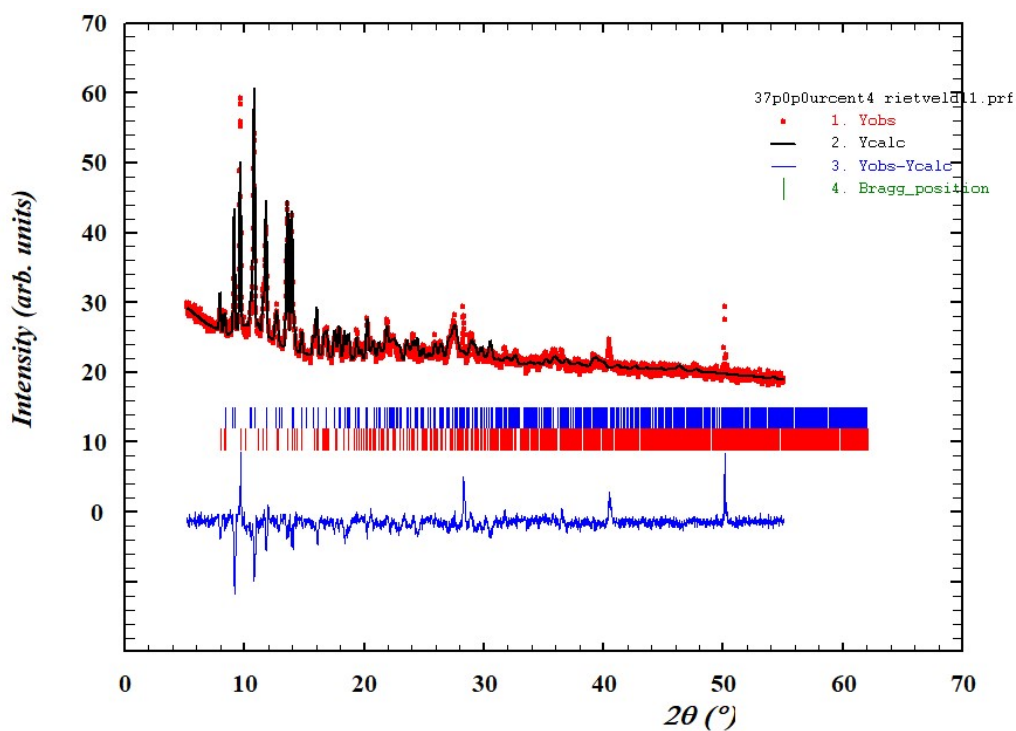

BRAGG R-Factors and weight fractions for Pattern # 1

-----  
 => Phase: 1 **I'**

=> Bragg R-factor: 42.6 Vol: 2725.223( 4.547) Fract(%): 45.22( 4.79)

=> Rf-factor= 20.9 ATZ: 2797.669 Brindley: 1.0000

=> Phase: 2 **I**

=> Bragg R-factor: 22.7 Vol: 3374.759( 6.222) Fract(%): 54.78( 5.56)

=> Rf-factor= 16.5 ATZ: 3230.040 Brindley: 1.0000

**Figure S5.** Powder diffraction patterns of **I'/I** at 37.7 % r.H. and values of agreement parameters obtained with Rietveld refinement.

## References

1. P. K. Tsobnang, J. L. Ngolui, E. Wenger, P. Durand, S. Dahaoui, C. Lecomte, *Cryst. Growth Des.*, 2017, **17**, 4908 – 4917.
2. P. K. Tsobnang, E. Hastürk, D. Fröhlich, E. Wenger, P. Durand, J. N. Lambi, C. Lecomte, C. Janiak, *Cryst. Growth Des.*, 2019, **19**, 2869 – 2880.
3. Mercury 4.0: from visualization to analysis, design and prediction  
C. F. Macrae, I. Sovago, S. J. Cottrell, P. T. A. Galek, P. McCabe, E. Pidcock, M. Platings, G. P. Shields, J. S. Stevens, M. Towler and P. A. Wood, *J. Appl. Cryst.*, **53**, 226 – 235, 2020.
4. S. Glomb, G. Makhloufi; I. Gruber, C. Janiak, *Inorg. Chim. Acta*, 2018, **475**, 35 – 46.
5. S. Glomb, D. Woschko, G. Makhloufi, C. Janiak, *ACS Appl. Mater. Interfaces.*, 2017, **9**, 37419 – 37434.
